# Supplementary material for: Reinforcement and interphase of polymer/graphene oxide nanocomposites
Source: Royal Society of Chemistry journal article supplement (doi:10.1039/c2jm15062j), 2012-01-01
Supplement: c2jm15062j.pdf [file c2jm15062j.pdf]

## Supporting Information

# Reinforcement and interphase of polymer/graphene oxide nanocomposites

Chaoying Wan and Biqiong Chen\*

Department of Mechanical and Manufacturing Engineering, Trinity Center for Bioengineering,  
Trinity College Dublin, Dublin 2, Ireland

\*To whom correspondence should be addressed. Tel +353 1 896 1729. Fax +353 1 679 5554.

E-mail address: chenb@tcd.ie

**Table S1** Measured contact angle values for polymers referred from the literature<sup>a</sup>

| Polymer | Water | Formamide | Diiodomethane | Ref. |
|---------|-------|-----------|---------------|------|
| PE      | 77.46 | 74.1      | 53.5          | 1    |
| PS      | 80    | 62        | 39            | 2    |
| PCL     | 64.8  | 46        | 46.3          | 3    |
| PLLA    | 67    | 62.9      | 36.0          | 2,4  |
| GO      | 67.4  | 18.5      | 38.5          | 5    |

<sup>a</sup>all the contact angle values were measured by the sessile drop method at ambient humidity and temperature with two different polar liquids (deionized water and formamide) and one nonpolar liquid (diiodomethane).

**Table S2** Density and Poisson's ratio values used in the calculation

| Polymer                      | LLDPE | PP   | PS   | PCL  | PLLA | PEO  | PVA  | PEN  | PMMA |
|------------------------------|-------|------|------|------|------|------|------|------|------|
| Density (Mg/m <sup>3</sup> ) | 0.87  | 0.95 | 1.05 | 1.13 | 1.22 | 1.09 | 1.30 | 1.33 | 1.18 |
| Poisson's ratio, $\nu$       | 0.40  | 0.36 | 0.34 | 0.46 | 0.4  | 0.3  | 0.4  | 0.32 | 0.37 |

## References

1 C.J. van Oss, *Interfacial Forces in Aqueous Media*, Marcel Dekker, Inc., 1994.

2 A. M. Gallardo-Moreno, M. L. Gonzalez-Martin, C. Perez-Giraldo, E. Garduno, J. M. Bruque and A. C. Gomez-Garcia, *Appl. Environ. Microbiol.*, 2002, **68**, 2610-2613.

3 H. Y. Erbil, B. Yasar, S. Suezter, B. M. Baysal, *Langmuir*, 1997, **13**, 5484-5493.

4 E. I. Vargha-Butler, E. Kiss, C. N. C. Lam, Z. Keresztes, E. Kálmán, L. Zhang and A. W. Neumann, *Colloid. Polym. Sci.*, 2001, **279**, 1160-1168.

5 S. R. Wang, Y. Zhang, N. Abidi and L. Cabrales, *Langmuir*, 2009, **25**, 11078–11081.
